# Supplementary material for: Cyclophane size drives the photochemical behaviour of benzophenone
Source: Royal Society of Chemistry journal article supplement (doi:10.1039/c2pp25025j), 2012-03-29
Supplement: c2pp25025j.pdf [file c2pp25025j.pdf]

## Electronic Supporting Information

### Cyclophane-size driving the photochemical behaviour of benzophenone.

Yolanda Vida,<sup>a</sup> Ezequiel Perez-Inestrosa\*<sup>a</sup>

<sup>a</sup> Department of Organic Chemistry, Faculty of Sciences, University of Malaga, Malaga, Spain. Fax: +34 952133433; Tel: + 34952137565; E-mail: inestrosa@uma.es

#### Table of Contents

|                                                                                                          |    |
|----------------------------------------------------------------------------------------------------------|----|
| Synthesis and Characterization of <b>1</b> and <b>2</b>                                                  |    |
| Materials and Method                                                                                     | 1  |
| Synthetic scheme for <b>1</b>                                                                            | 2  |
| Synthetic scheme for <b>2</b>                                                                            | 2  |
| Characterization of <b>1</b>                                                                             | 2  |
| Characterization of <b>2</b>                                                                             | 5  |
| Photochemical reaction and numbering of the molecules                                                    | 6  |
| NMR-Spectra                                                                                              | 7  |
| <sup>1</sup> H and <sup>13</sup> C-NMR of 2,4-Bis[3'-(tosyloxy)benzyloxy]benzophenone                    | 7  |
| <sup>1</sup> H and <sup>13</sup> C-NMR of 2,4-Bis[3'-(hydroxyl)benzyloxy]benzophenone ( <b>4a</b> )      | 8  |
| <sup>1</sup> H and <sup>13</sup> C-NMR of 2-Hydroxy-4-[3'-(tosyloxy)benzyloxy]benzophenone               | 9  |
| <sup>1</sup> H and <sup>13</sup> C-NMR of 2-Hydroxy-4-[3'-(hydroxyl)benzyloxy]benzophenone ( <b>4b</b> ) | 10 |
| <sup>1</sup> H and <sup>13</sup> C-NMR of <b>1</b>                                                       | 11 |
| <sup>1</sup> H and <sup>13</sup> C-NMR of <b>2</b>                                                       | 12 |
| <sup>1</sup> H and <sup>13</sup> C-NMR of <b>5</b>                                                       | 13 |
| <sup>1</sup> H and <sup>13</sup> C-NMR of <b>7</b>                                                       | 14 |

#### Synthesis and Characterization of **1** and **2**.

##### Materials and method

Chemicals were used from commercial sources without any purification. Thin layer chromatography (TLC) was performed on silica gel 60 F 254 (Merck 5719) or on silica gel 60 F 254 (Merck 7747) prepared plates and revealed with a ultra-violet lamp. Column chromatography was carried out on silica gel 60 (40–63 μm) from Merck (7736) for flash chromatography or silica gel 60 (63–200 μm) from Merck (7734) for gravity columns.

Absorption spectra were recorded on a Hewlett-Packard 8452A Diode Array Spectrophotometer. Samples for absorption spectra were prepared in spectroscopic grade solvents and adjusted to a linear range response. Emission spectra were recorded in a Jasco FP-750 spectrofluorometer. Samples for emission spectra were prepared in

spectroscopic grade solvents and adjusted to a linear range response. No fluorescent contaminants were detected in the wavelength region of experimental interest upon excitation. Fluorescence quantum yields were determined by comparison with 0.1 M quinine sulphate in 0.05 M sulphuric acid as a reference, and corrected for the refractive index of the solvent. The samples were irradiated in an immersion well photo reactor (Pyrex) equipped with a 150 W medium-pressure mercury lamp.

### Synthetic scheme and numbering of the molecules

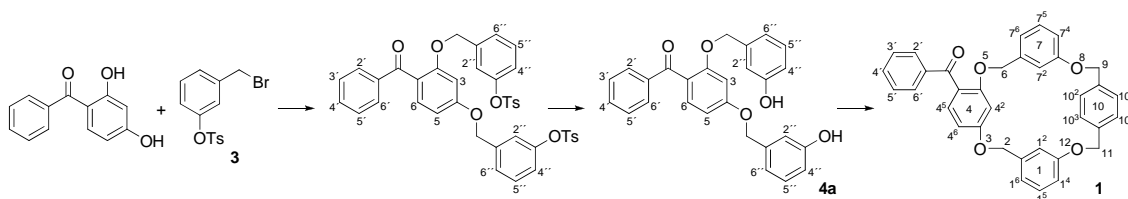

Figure S1. Synthetic scheme for 3,5,8,12-Tetraoxa-4<sup>4</sup>-benzoyl-1,4,7(1,3),10(1,4)-tetrabenzenacyclododecaphane (**1**) and numbering of the molecules

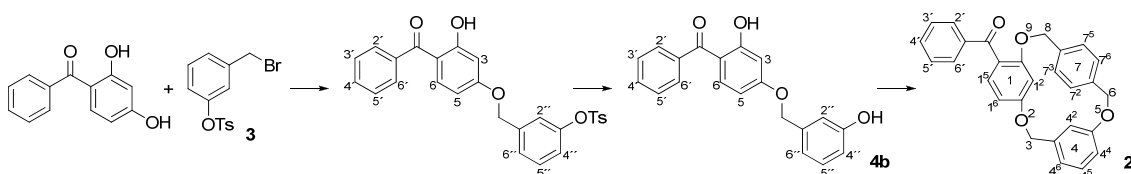

Figure S2. Synthetic scheme for 2,5,9-trioxa-1<sup>4</sup>-benzoyl-1,4(1,3),7(1,4)-tribenzenacyclononaphane (**2**) and numbering of the molecules

### Characterization of 1. Assignment of the signals.

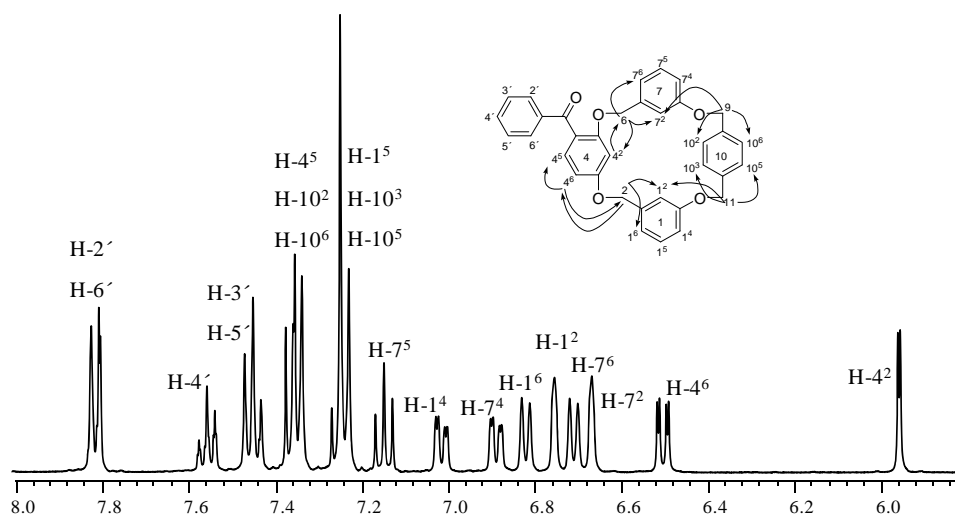

Figure S3. Expansion of the <sup>1</sup>H-RMN (CDCl<sub>3</sub>, 400 MHz) of **1**. In the structure are shown some of nOe effects observed.

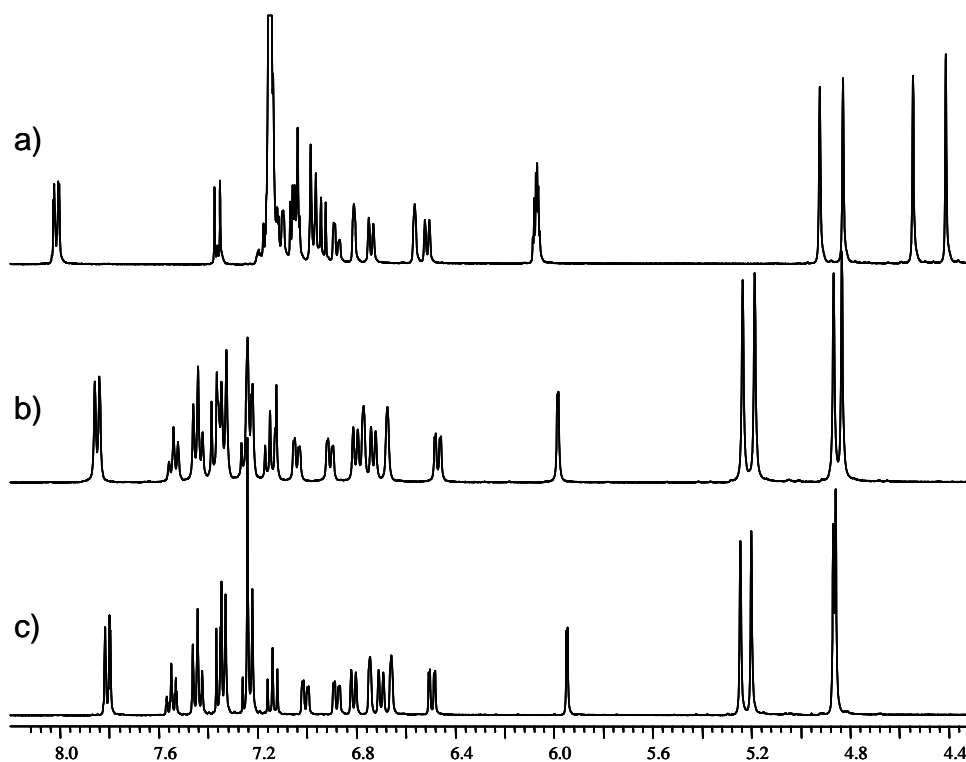

Figure S4.  $^1\text{H}$ -RMN (400 MHz) spectra of **1** recorded in en  $\text{C}_6\text{D}_6$  (a),  $\text{CDCl}_3:\text{C}_6\text{D}_6$  (9:1) (b) and  $\text{CDCl}_3$  (c).

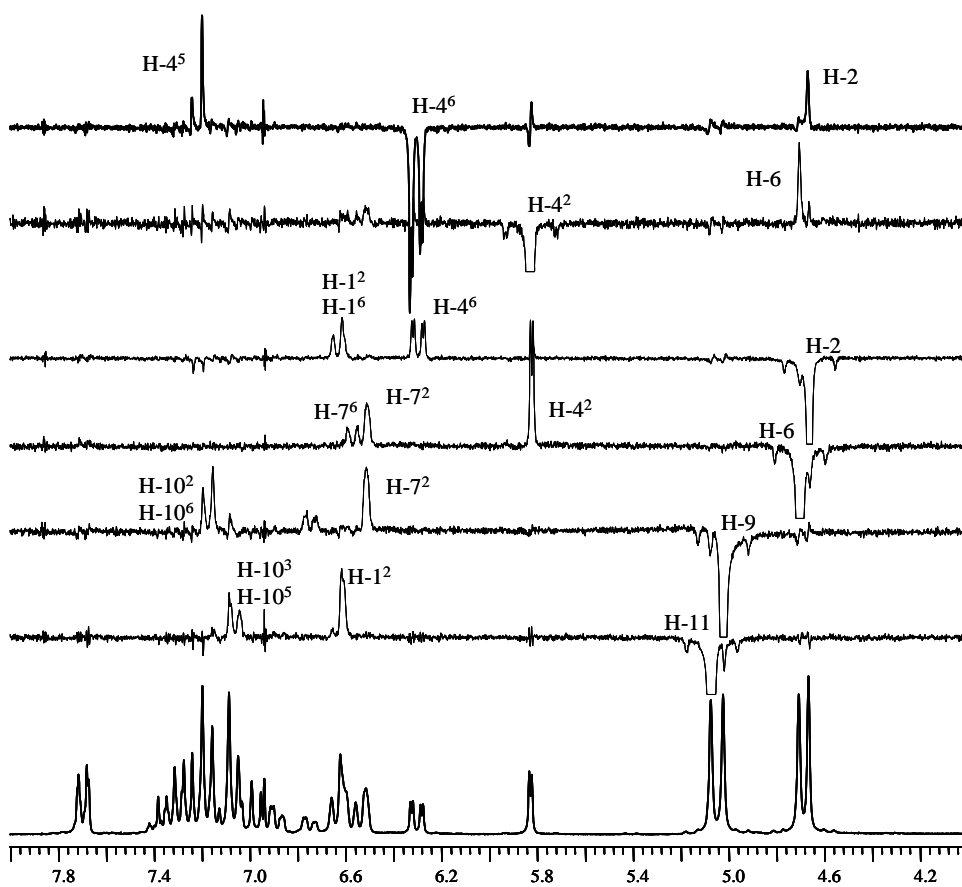

Figure S5. NOEDIFF experiments ( $\text{CDCl}_3:\text{C}_6\text{D}_6$  (9:1), 200 MHz) of **1**.

|                                  | <sup>1</sup> H-RMN (ppm)              | <sup>13</sup> C-RMN (ppm) | HMBC ( <i>J</i> <sup>3</sup> ) correlations                    |
|----------------------------------|---------------------------------------|---------------------------|----------------------------------------------------------------|
| 1 <sup>2</sup>                   | 6.70 (s, 1H)                          | 111.4                     | C-1 <sup>4</sup> , C-1 <sup>6</sup> , C-2                      |
| 1 <sup>4</sup>                   | 6.96 (dd, 1H, <i>J</i> = 7.8, 2.1 Hz) | 117.7                     | C-1 <sup>2</sup> , C-1 <sup>6</sup>                            |
| 1 <sup>5</sup>                   | 7.20 (m, 3H)                          | 129.5                     | C-1 <sup>1</sup> , C-1 <sup>3</sup>                            |
| 1 <sup>6</sup>                   | 6.77 (d, 1H, <i>J</i> = 7.8 Hz)       | 119.6                     | C-1 <sup>2</sup> , C-1 <sup>4</sup> , C-2                      |
| 4 <sup>2</sup>                   | 5.91 (d, 1H, <i>J</i> = 2.1 Hz)       | 102.3                     | C-4 <sup>4</sup> , C-4 <sup>6</sup>                            |
| 4 <sup>5</sup>                   | 7.30 (m, 3H)                          | 131.7                     | C-4 <sup>1</sup> , C-4 <sup>3</sup>                            |
| 4 <sup>6</sup>                   | 6.45 (dd, 1H, <i>J</i> = 7.8, 2.1 Hz) | 103.8                     | C-4 <sup>2</sup> , C-4 <sup>4</sup>                            |
| 7 <sup>2</sup>                   | 6.62 (s, 1H)                          | 110.6                     | C-7 <sup>4</sup> , C-7 <sup>6</sup> , C-6                      |
| 7 <sup>4</sup>                   | 6.84 (dd, 1H, <i>J</i> = 7.8, 2.1 Hz) | 116.6                     | C-7 <sup>2</sup> , C-7 <sup>6</sup>                            |
| 7 <sup>5</sup>                   | 7.10 (t, 1H, <i>J</i> = 7.8 Hz)       | 130.0                     | C-7 <sup>1</sup> , C-7 <sup>3</sup>                            |
| 7 <sup>6</sup>                   | 6.65 (d, 1H, <i>J</i> = 7.8 Hz)       | 118.3                     | C-7 <sup>2</sup> , C-7 <sup>4</sup> , C-6                      |
| 10 <sup>2</sup> -10 <sup>6</sup> | 7.30 (m, 3H)                          | 127.3                     | C-10 <sup>2</sup> , 10 <sup>6</sup> , C-10 <sup>4</sup> , C-9  |
| 10 <sup>3</sup> -10 <sup>5</sup> | 7.20 (m, 3H)                          | 125.6                     | C-10 <sup>3</sup> , 10 <sup>5</sup> , C-10 <sup>1</sup> , C-11 |
| 2', 6'                           | 7.76 (d, 2H, <i>J</i> = 7.8 Hz)       | 129.7                     | C-2', 6', C-4', CO                                             |
| 3', 5'                           | 7.40 (t, 2H, <i>J</i> = 7.8 Hz)       | 128.1                     | C-1', C-3', 5'                                                 |
| 4'                               | 7.51 (t, 1H, <i>J</i> = 7.8 Hz)       | 132.5                     | C-2', 6'                                                       |
| 2                                | 4.82 (s, 4H)                          | 69.5                      | C-1 <sup>2</sup> , C-1 <sup>6</sup> , C-4 <sup>1</sup>         |
| 6                                | 4.82 (s, 4H)                          | 70.3                      | C-4 <sup>3</sup> , C-7 <sup>2</sup> , C-7 <sup>6</sup>         |
| 9                                | 5.16 (s, 2H)                          | 68.6                      | C-10 <sup>2</sup> , 10 <sup>6</sup> , C-7 <sup>3</sup>         |
| 11                               | 5.20 (s, 2H)                          | 69.6                      | C-10 <sup>3</sup> , 10 <sup>5</sup> , C-1 <sup>3</sup>         |

Table S1. Spectroscopic data of **1** assigned based on the HMQC and HMBC spectra of **1**.

## Characterization of 2. Assignment of the signals.

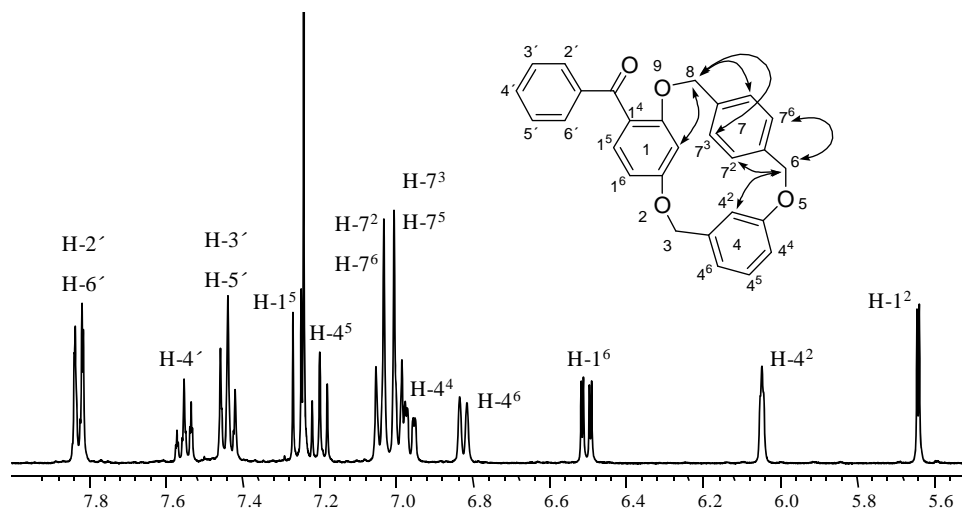

Figure S6. Expansion of the  $^1\text{H}$ -RMN ( $\text{CDCl}_3$ , 400 MHz) of **2**. In the structure are shown some of nOe effects observed.

|               | $^1\text{H}$ -RMN (ppm)          | $^{13}\text{C}$ -RMN (ppm) | HMBC ( $J^3$ ) correlations                                |
|---------------|----------------------------------|----------------------------|------------------------------------------------------------|
| $1^2$         | 5.64 (d, 1H, $J = 2.4$ Hz)       | 109.9                      | C-1 <sup>4</sup> , C-1 <sup>6</sup>                        |
| $1^5$         | 7.26 (d, 1H, $J = 7.9$ Hz)       | 131.5                      | C-1 <sup>1</sup> , C-1 <sup>3</sup> , CO                   |
| $1^6$         | 6.50 (dd, 1H, $J = 7.9, 2.4$ Hz) | 110.5                      | C-1 <sup>2</sup> , C-1 <sup>4</sup>                        |
| $4^2$         | 6.05 (sa, 1H)                    | 117.4                      | C-4 <sup>4</sup> , C-4 <sup>6</sup> , C-3                  |
| $4^4$         | 6.96 (dd, 1H, $J = 7.9, 2.4$ Hz) | 119.7                      | C-4 <sup>2</sup> , C-4 <sup>6</sup>                        |
| $4^5$         | 7.20 (t, 1H, $J = 7.9$ Hz)       | 129.5                      | C-4 <sup>1</sup> , C-4 <sup>3</sup>                        |
| $4^6$         | 6.82 (d, 1H, $J = 7.9$ Hz)       | 120.7                      | C-4 <sup>2</sup> , C-4 <sup>4</sup> , C-3                  |
| $7^2$ - $7^6$ | 6.99 (d, 2H, $J = 7.9$ Hz)       | 128.4                      | C-7 <sup>2</sup> , 7 <sup>6</sup> , C-7 <sup>4</sup> , C-6 |
| $7^3$ - $7^5$ | 7.04 (d, 2H, $J = 7.9$ Hz)       | 129.0                      | C-7 <sup>3</sup> , 7 <sup>5</sup> , C-7 <sup>1</sup> , C-8 |
| $2'$ , $6'$   | 7.82 (d, 2H, $J = 7.9$ Hz)       | 129.8                      | C-2', 6', C-4', CO                                         |
| $3'$ , $5'$   | 7.44 (t, 2H, $J = 7.9$ Hz)       | 128.1                      | C-1', C-3', 5'                                             |
| $4'$          | 7.55 (t, 1H, $J = 7.9$ Hz)       | 132.7                      | C-2', 6'                                                   |
| 3             | 4.97 (s, 2H)                     | 69.1                       | C-1 <sup>1</sup> , C-4 <sup>2</sup> , C-4 <sup>6</sup>     |
| 6             | 5.10 (s, 2H)                     | 73.2                       | C-4 <sup>3</sup> , C-7 <sup>2</sup> , 7 <sup>6</sup>       |
| 8             | 4.82 (s, 2H)                     | 74.7                       | C1 <sup>3</sup> , C-7 <sup>3</sup> , 7 <sup>5</sup>        |

Table S2. Spectroscopic data of **2** assigned based on the HMQC and HMBC spectra of **2**.

## Photochemical reaction and numbering of the molecules

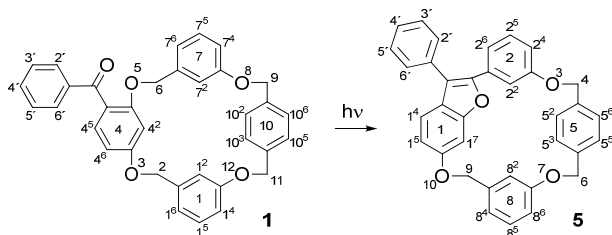

Figure S7. Photochemical reaction of **1** and numbering of the molecules

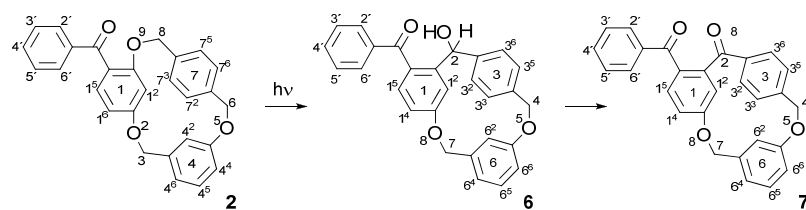

Figure S8. Photochemical reaction of **2** and numbering of the molecules

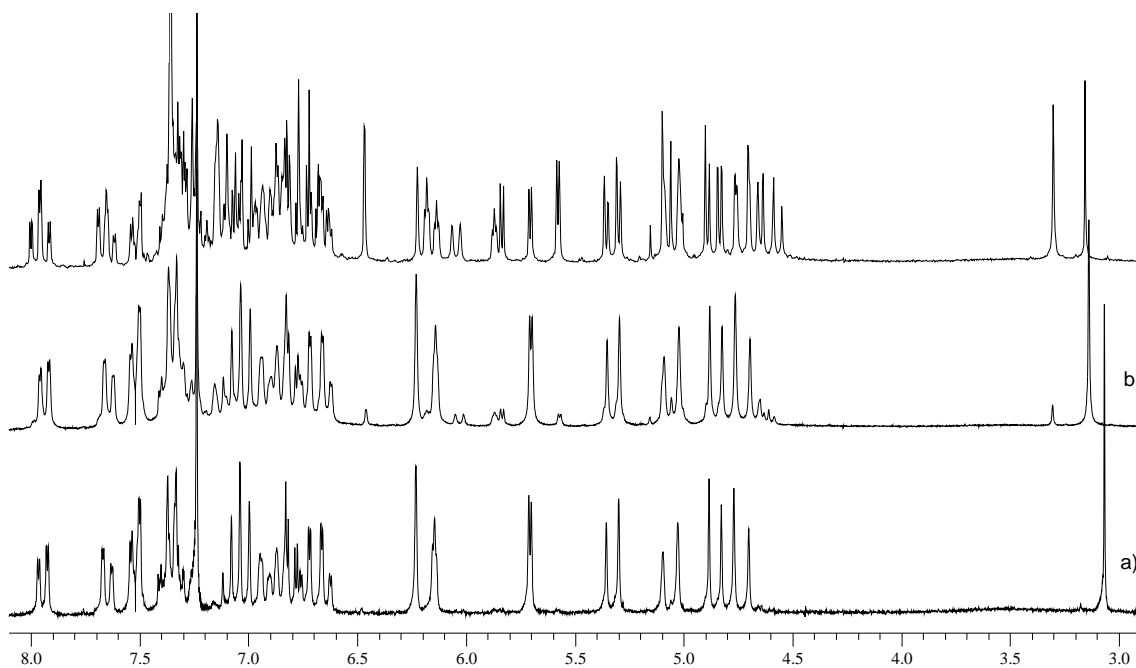

Figure S9.  $^1\text{H}$ -RMN (200 MHz) spectra of **6** recorded in en immediately after solution preparation (a), after 15 minutes (b) and after 1 h (c).

## NMR-Spectra

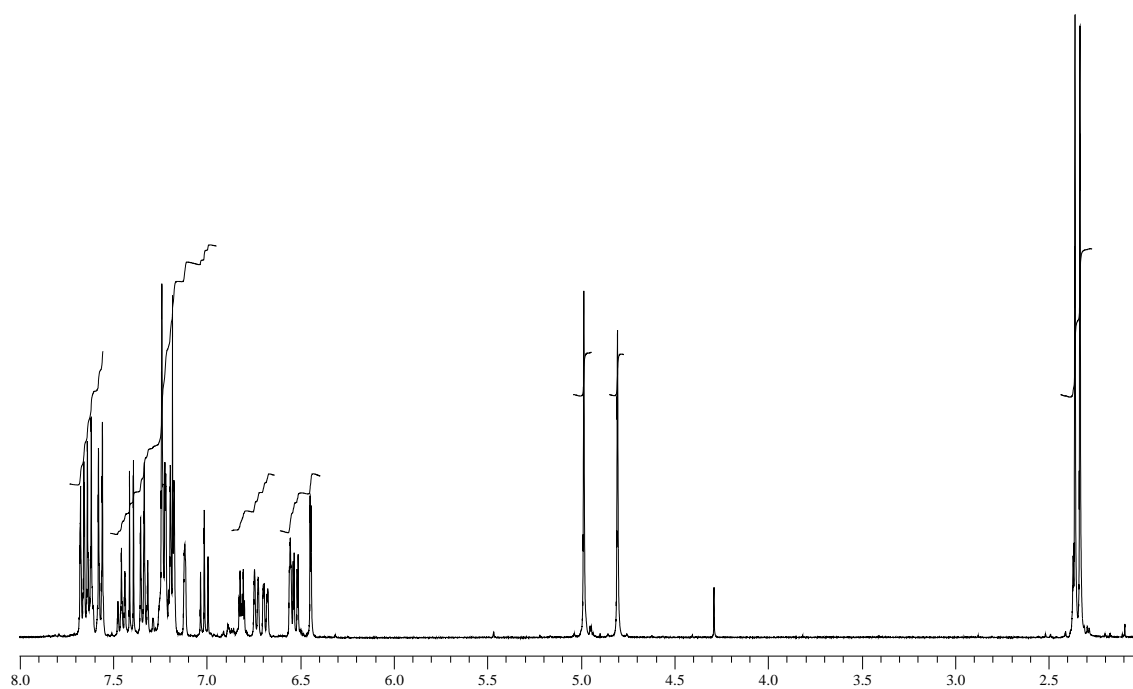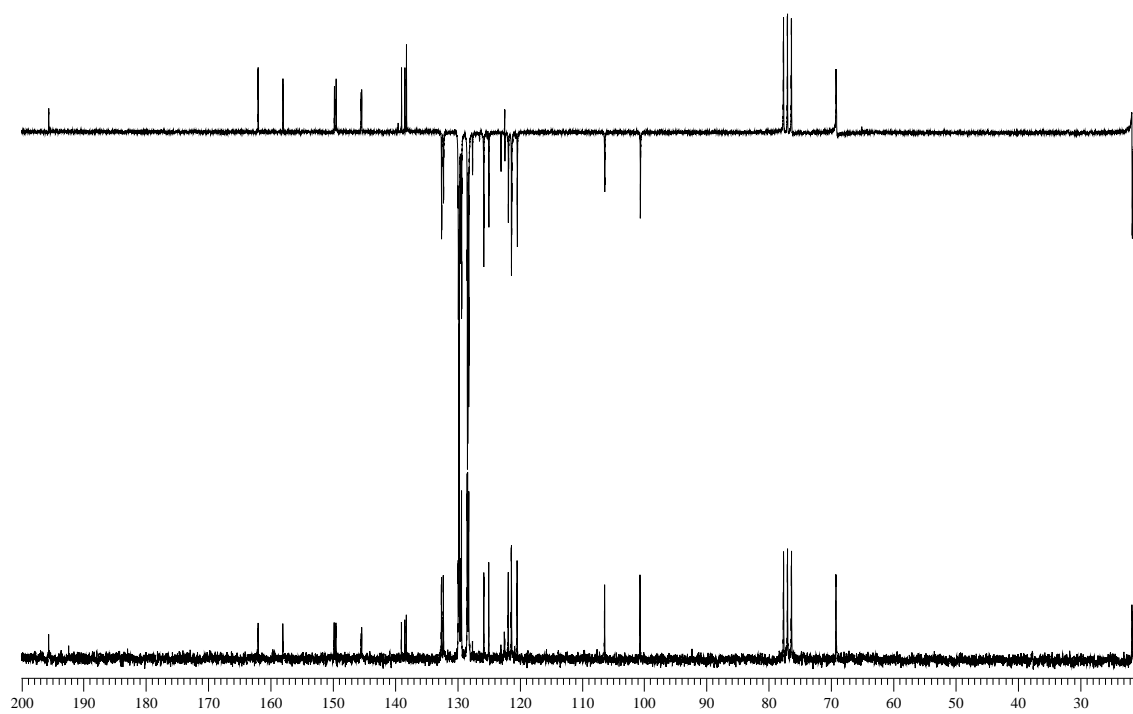

Figure S10. Proton, carbon and SEFT NMR spectra ( $\text{CDCl}_3$ ) of 2,4-Bis[3'-(tosyloxy)benzyloxy]benzophenone

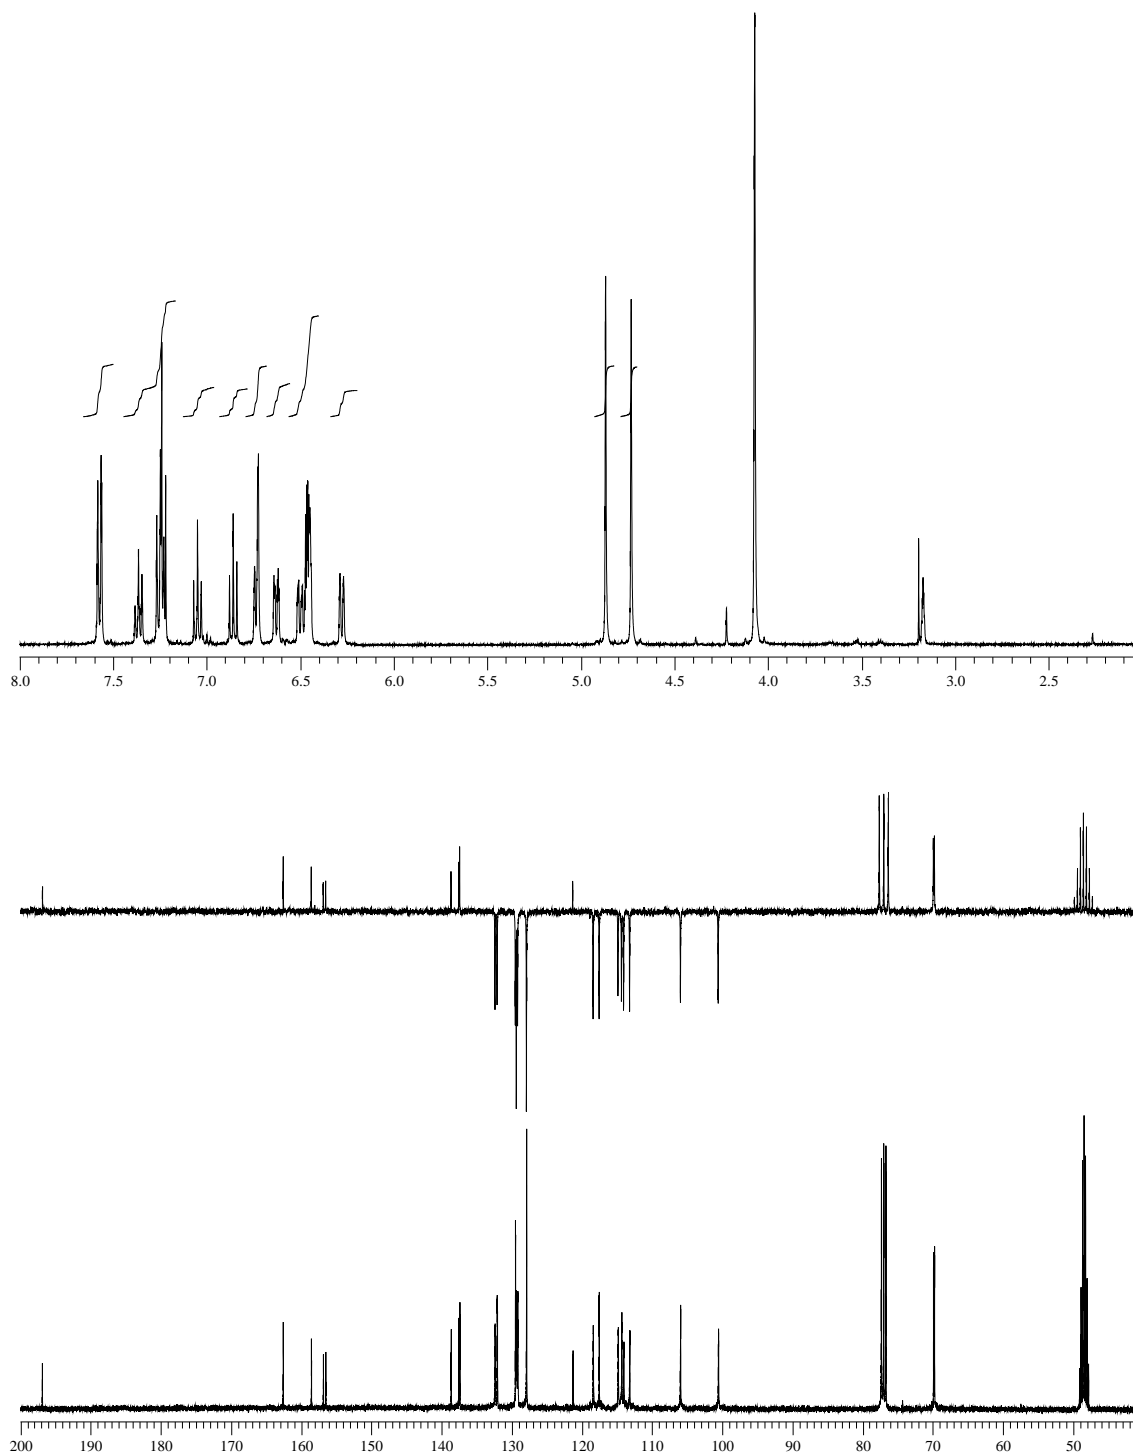

Figure S11. Proton, carbon and SEFT NMR spectra (CDCl<sub>3</sub>) of 2,4-Bis[3'-(hydroxyl)benzyloxy]benzophenone (4a)



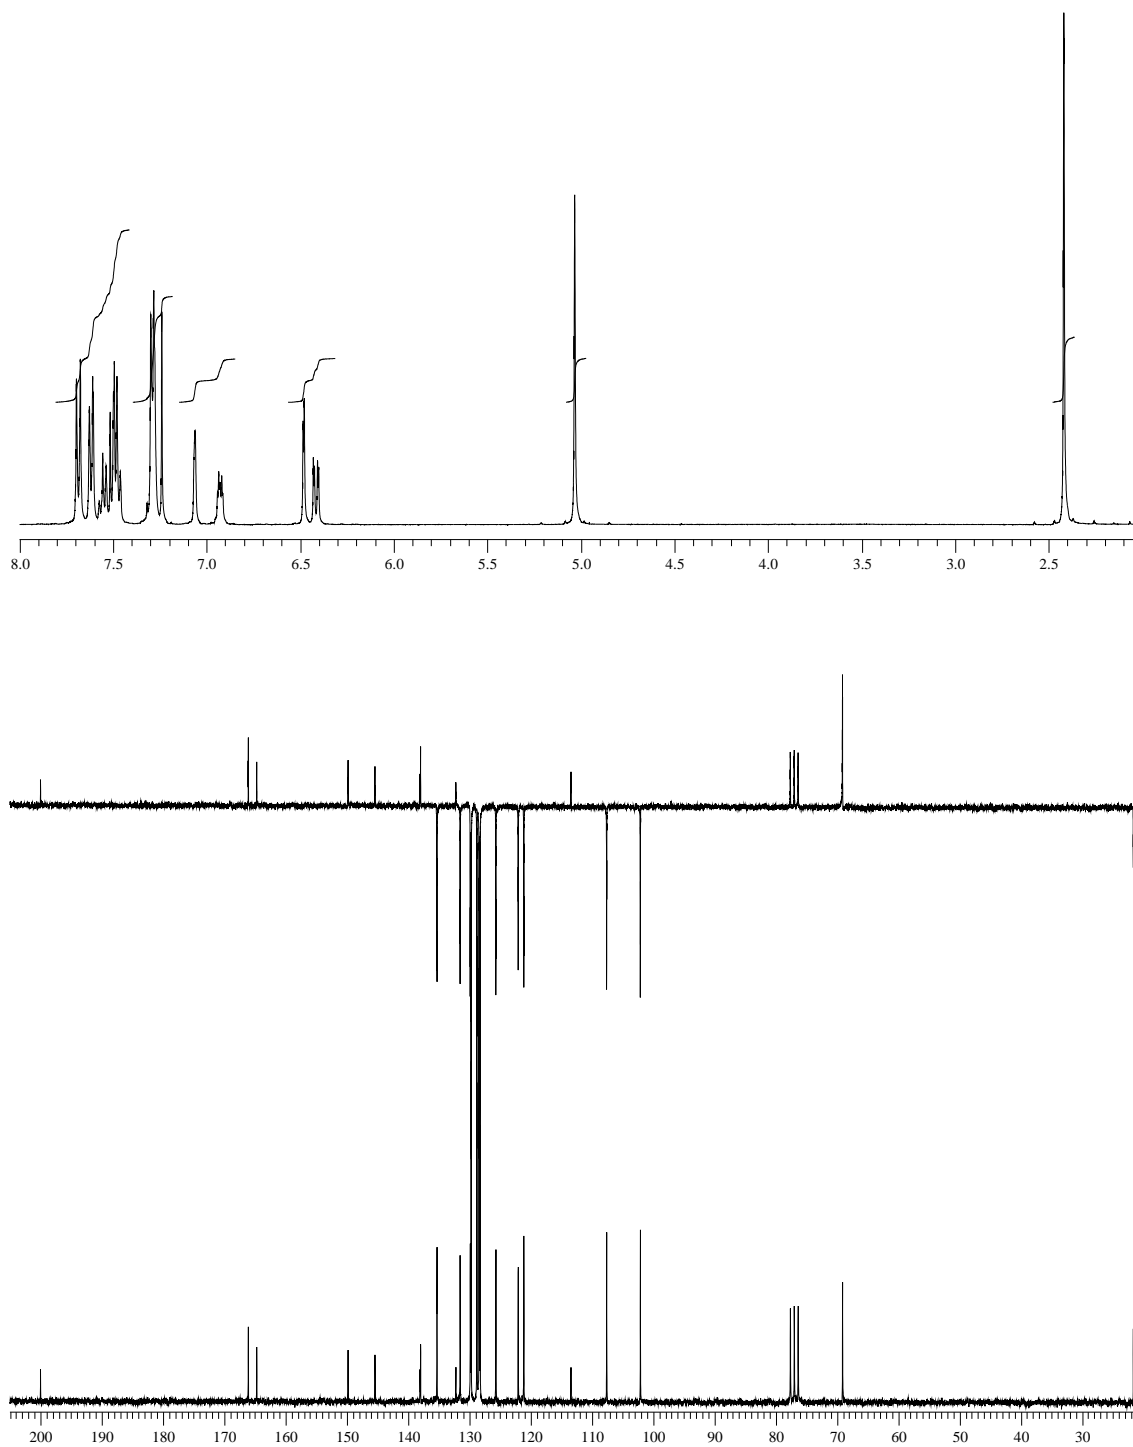

Figure S12. Proton, carbon and SEFT NMR spectra ( $\text{CDCl}_3$ ) of 2-Hydroxy-4-[3'-(tosyloxy)benzyloxy]benzophenone

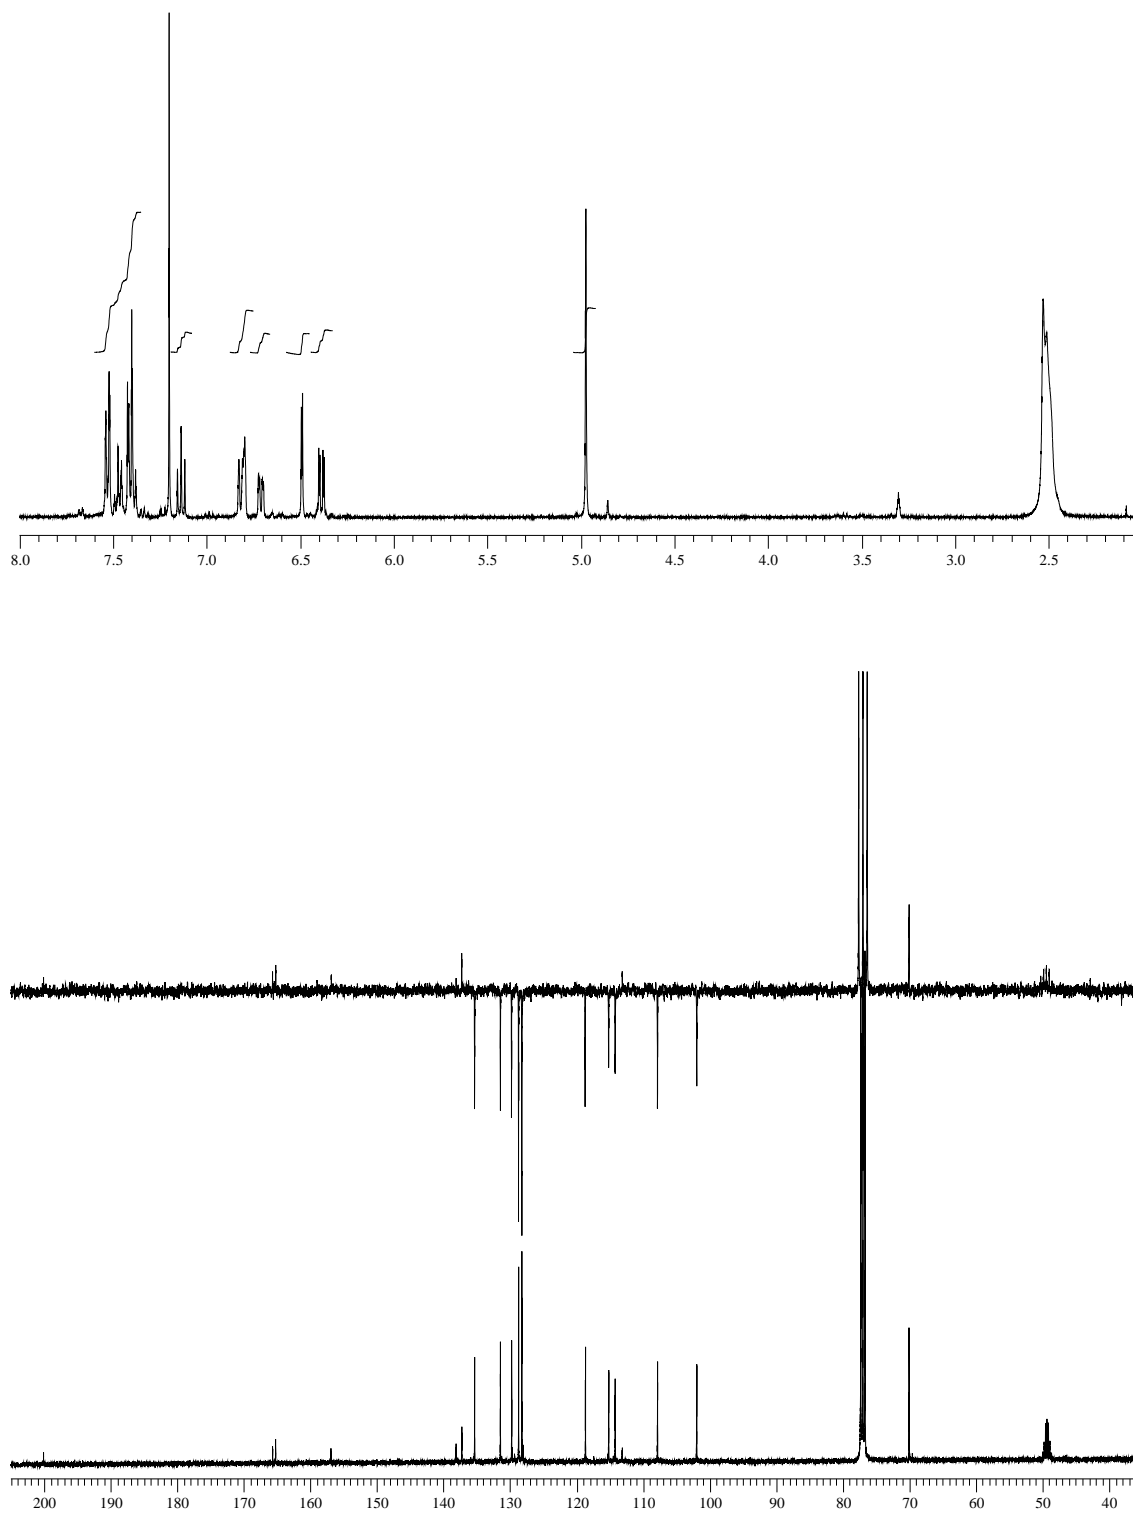

Figure S13. Proton, carbon and SEFT NMR spectra (CDCl<sub>3</sub>) of 2-Hydroxy-4-[3'-(hydroxy)benzyloxy]benzophenone (**4b**)

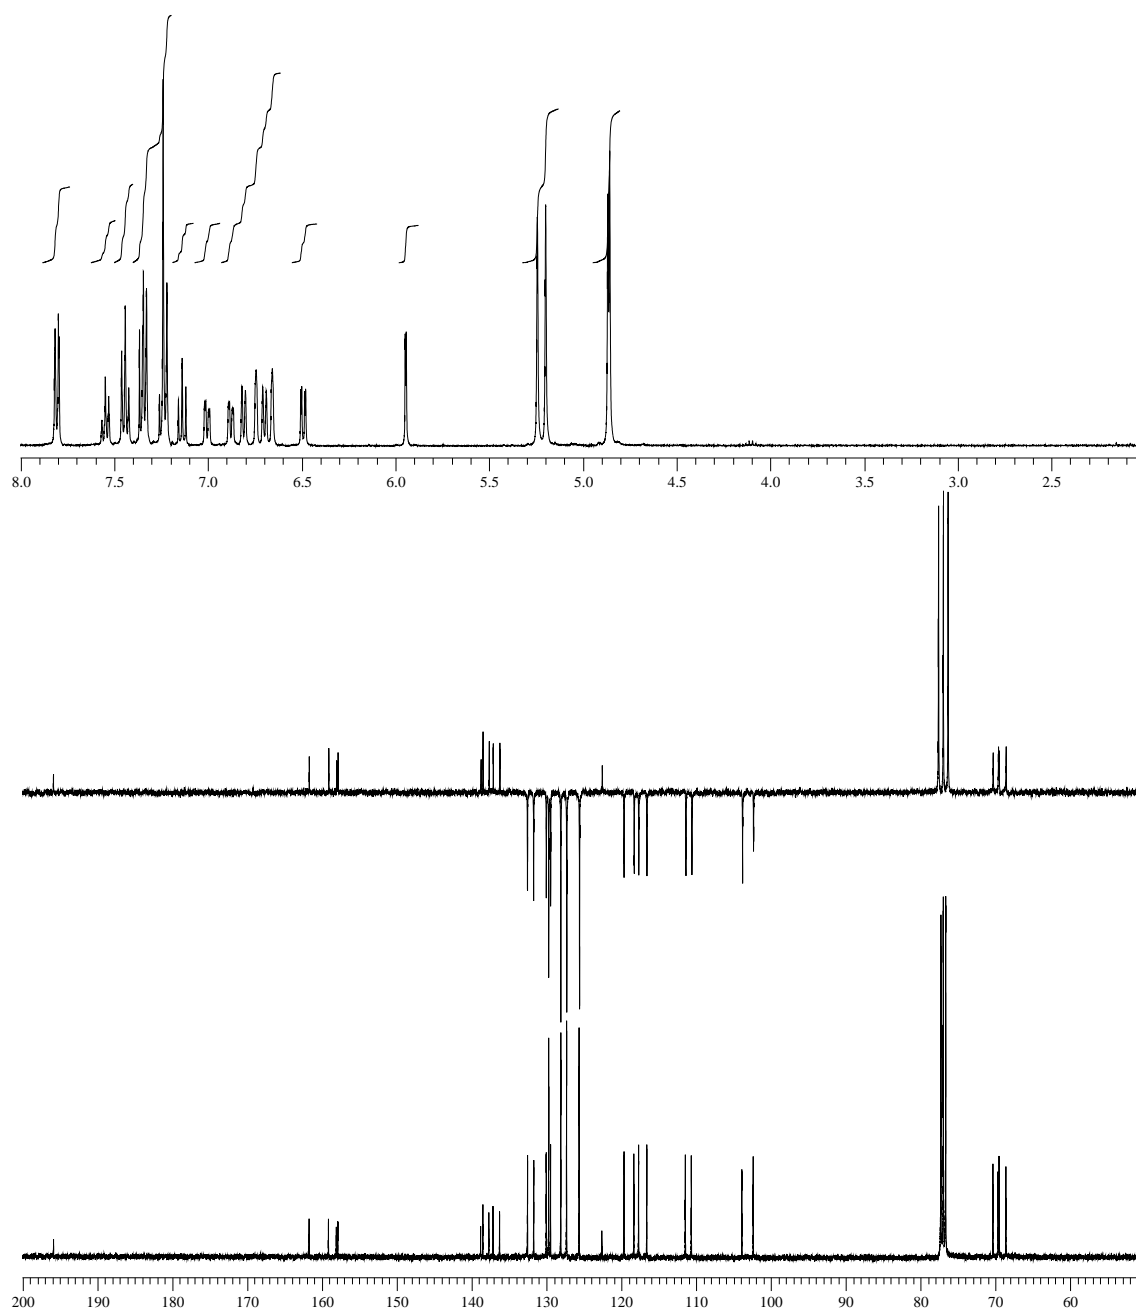

Figure S14. Proton, carbon and SEFT NMR spectra (CDCl<sub>3</sub>) of **1**

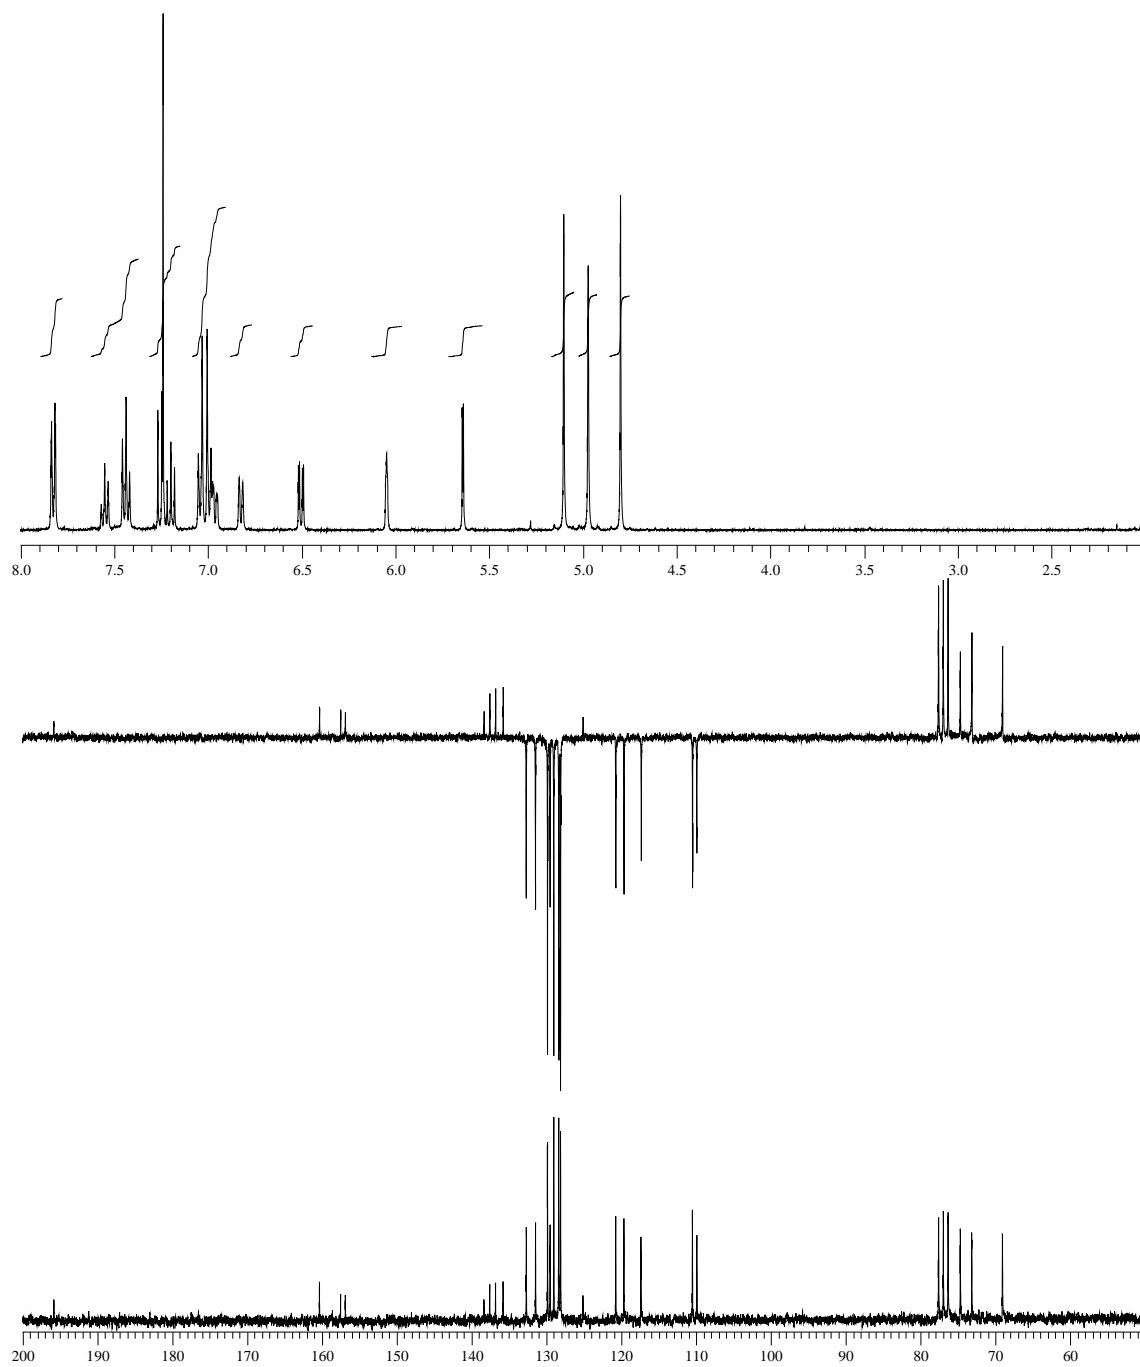

Figure S15. Proton, carbon and SEFT NMR spectra (CDCl<sub>3</sub>) of **2**

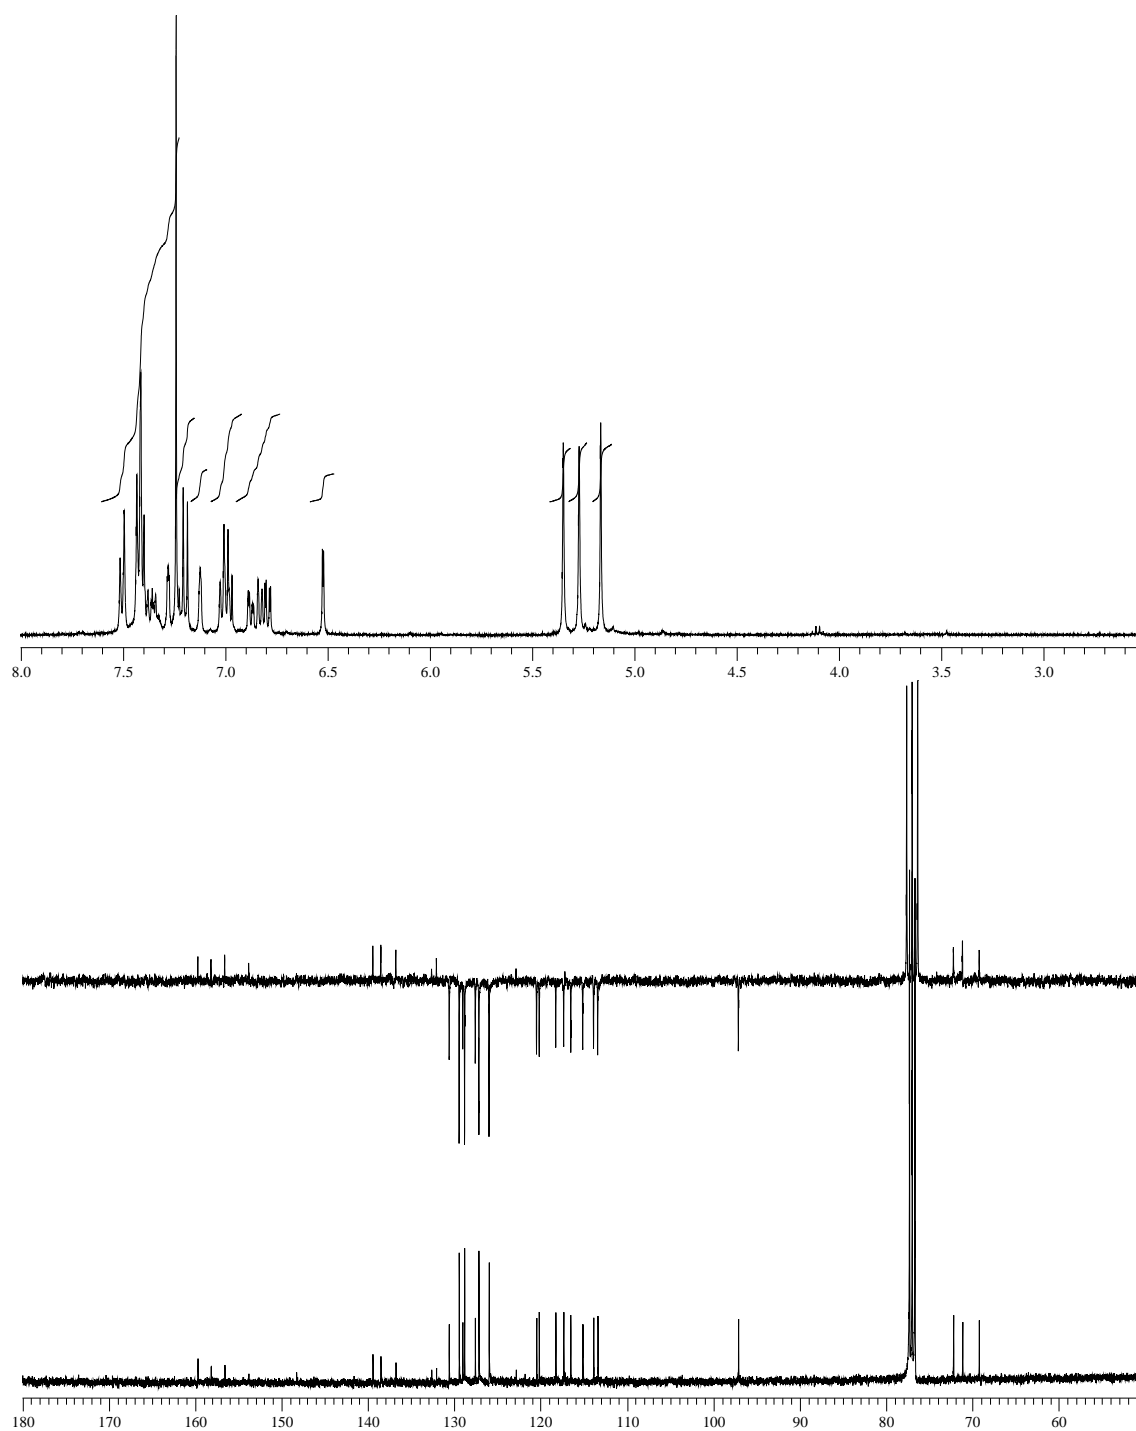

Figure S16. Proton, carbon and SEFT NMR spectra (CDCl<sub>3</sub>) of **5**

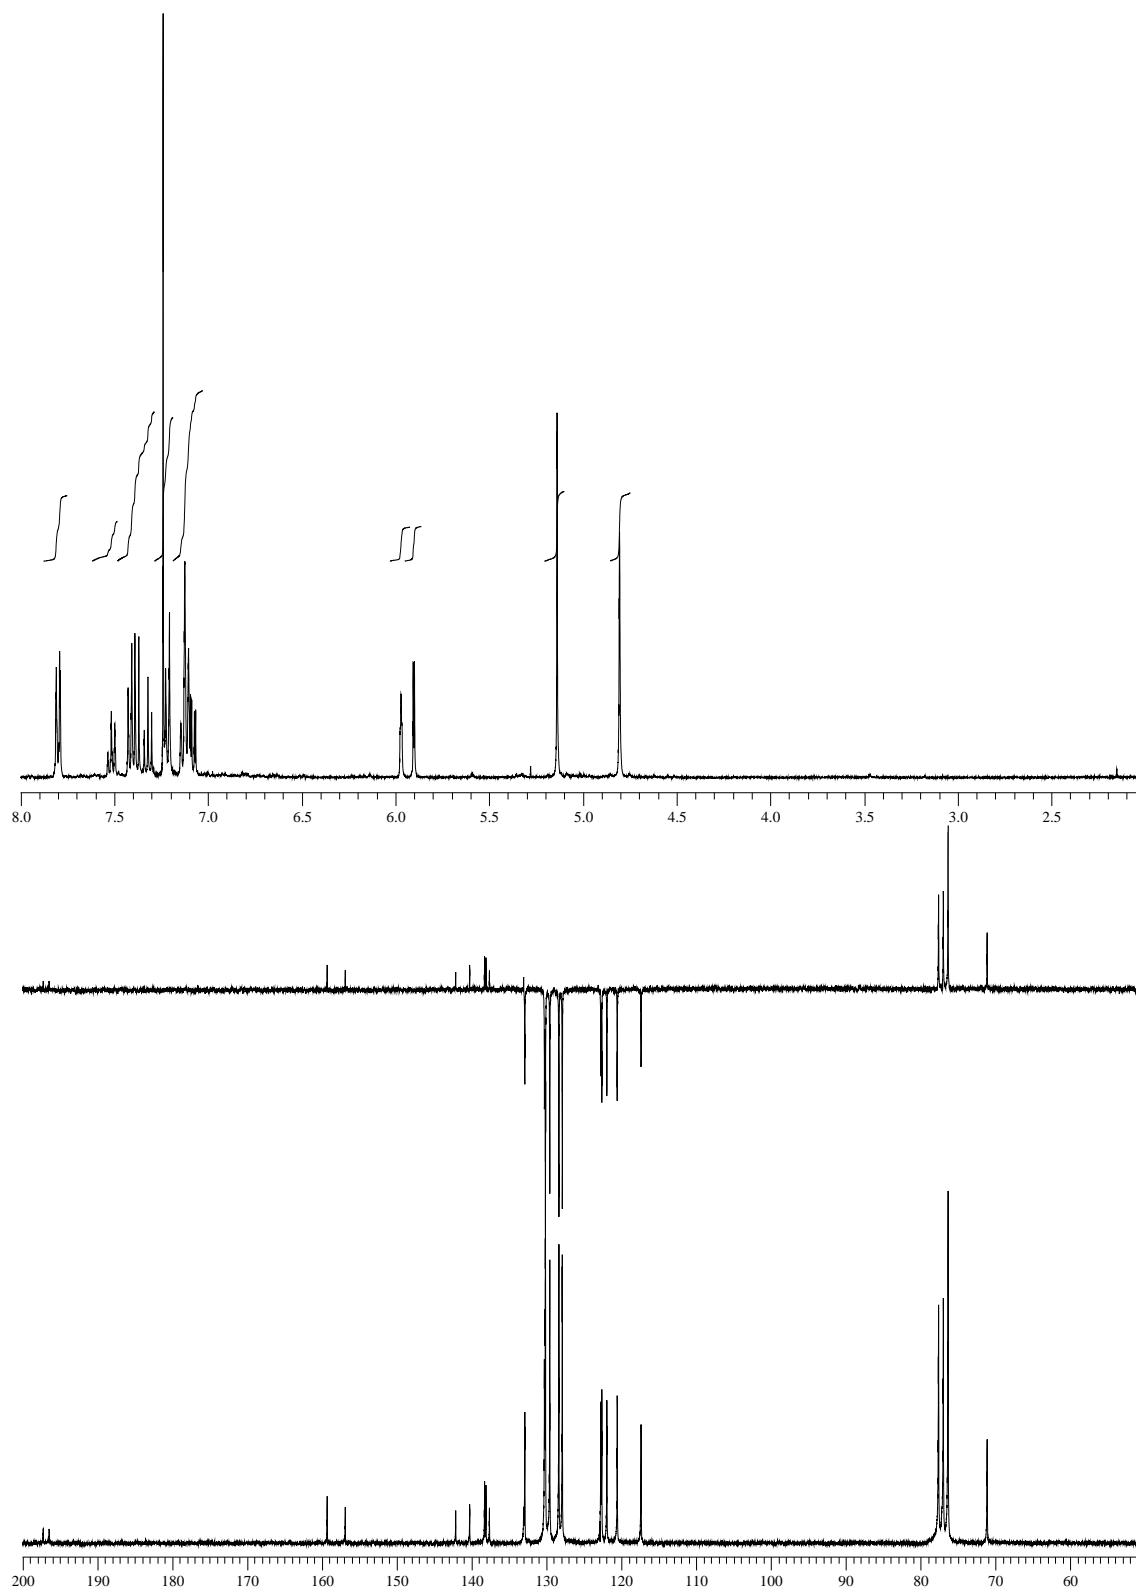

Figure S17. Proton, carbon and SEFT NMR spectra (CDCl<sub>3</sub>) of **7**
